# Supplementary material
Source: publisher site journal article supplement (http://kjim.org/upload/media/kjim-2022-408-Supplementary-Fig-3.pdf)
Supplement: Supplementary file 1 [file kjim-2022-408-Supplementary-Fig-3.pdf]

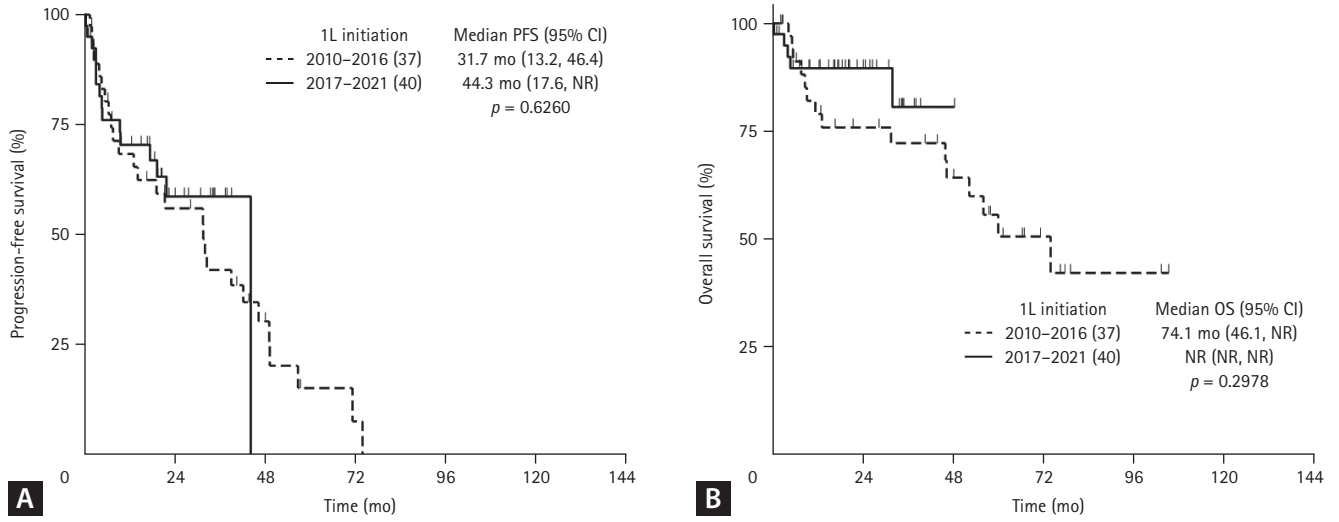

**Supplementary Fig. 3.** Survival outcomes from the first-line (1L) therapy by initiation period (2010–2016 vs. 2017–2021) in patients aged > 65 years. (A) Progression-free survival (PFS) and (B) overall survival (OS). CI, confidence interval; NR, not reached.
